# Supplementary material for: Unravelling the impact of electrolyte nature on Sn4P3/C negative electrodes for Na-ion batteries
Source: Royal Society of Chemistry journal article supplement (doi:10.1039/c9ta04288a), 2019-01-01
Supplement: c9ta04288a1.pdf [file c9ta04288a1.pdf]

## Supporting Information

# Unravelling the Impact of Electrolyte Nature on $\text{Sn}_4\text{P}_3/\text{C}$ Negative Electrodes for Na-ion Batteries

*Juan Luis Gómez-Cámer<sup>1,\*</sup>, Begoña Acebedo<sup>1</sup>, Nagore Ortiz-Vitoriano<sup>1,2</sup>, I.*

*Monterrubio<sup>1</sup>, Montserrat Galcerán<sup>1</sup>, Teófilo Rojo<sup>1,3,\*</sup>*

1 CIC EnergiGUNE, Albert Einstein 48, Technology Park of Álava, 01510 Miñano  
(Álava), Basque Country, Spain

2 IKERBASQUE, Basque Foundation for Science, 48013 Bilbao, Spain

3 Inorganic Chemistry Department, University of the Basque Country UPV/EHU, P.O.  
Box 644, 48080, Bilbao, Spain

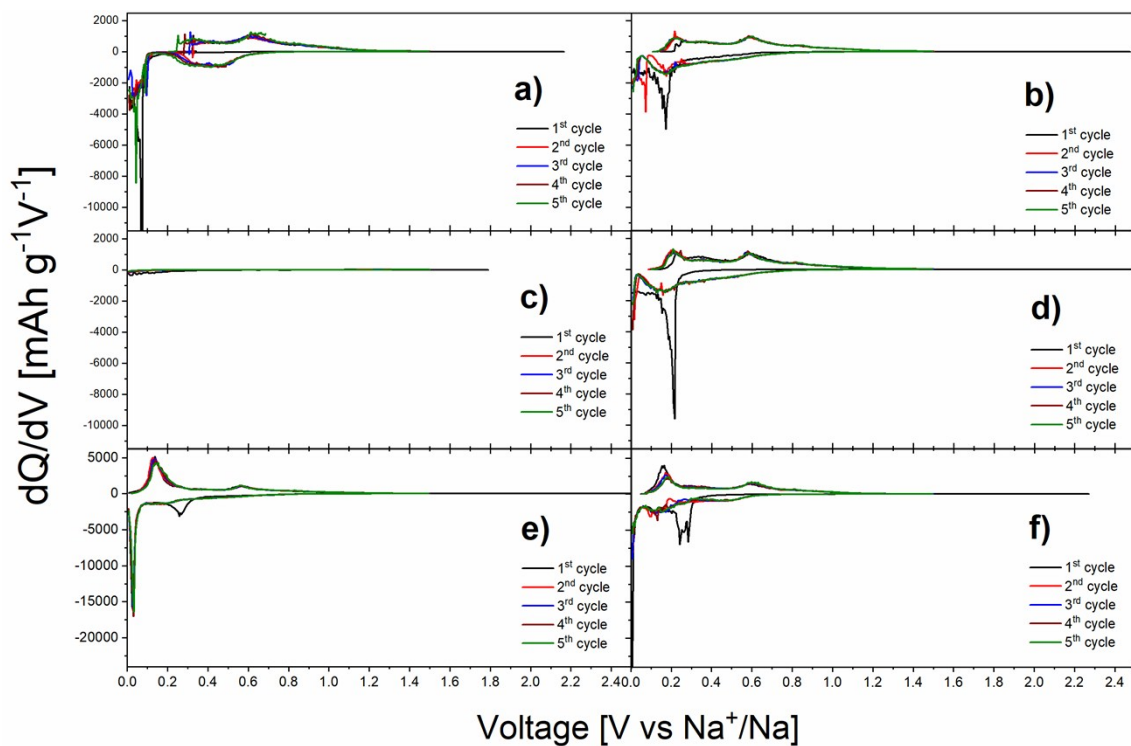

Figure S1. Derivative curves of the five initial charge/discharge cycles of  $\text{Sn}_4\text{P}_3/\text{C}$  electrodes cycled in a)  $\text{NaClO}_4/\text{EC}:\text{PC}$ , b)  $\text{NaClO}_4/\text{EC}:\text{PC}:\text{FEC}$ , c)  $\text{NaPF}_6/\text{EC}:\text{PC}$ , d)  $\text{NaPF}_6/\text{EC}:\text{PC}:\text{FEC}$ , e)  $\text{NaPF}_6/\text{DEGDME}$  and f)  $\text{NaPF}_6/\text{DEGDME}:\text{FEC}$  electrolyte.

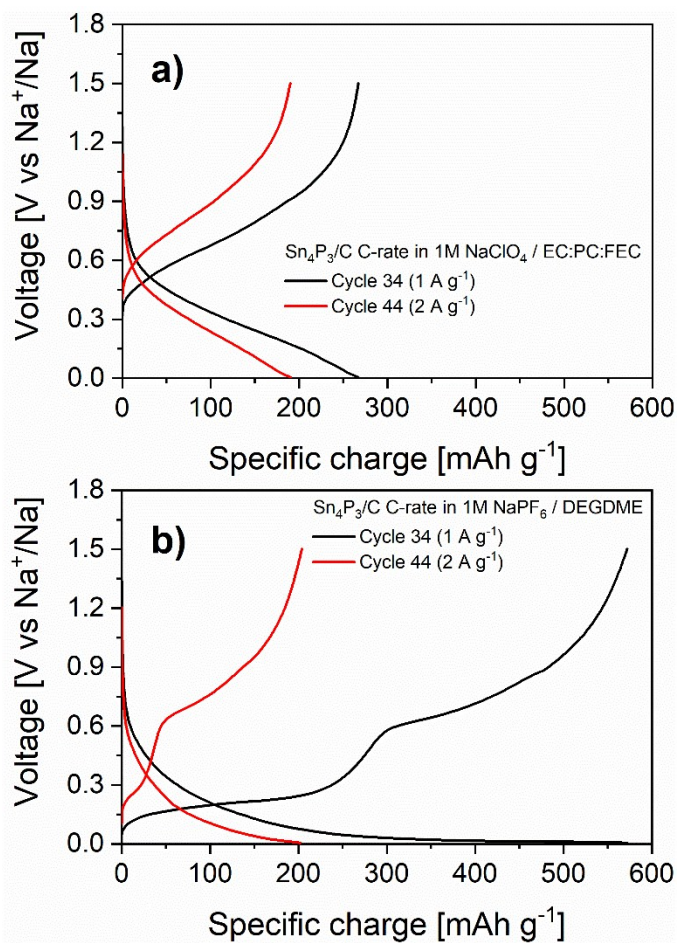

Figure S2. Galvanostatic curves of the 34th and 44th cycle at  $1\text{ A g}^{-1}$  and  $2\text{ A g}^{-1}$  of the  $\text{Sn}_4\text{P}_3/\text{C}$  electrodes in (a)  $1\text{M NaClO}_4/\text{EC:PC:FEC}$  and (b)  $1\text{M NaPF}_6/\text{DEGDME}$  electrolytes.

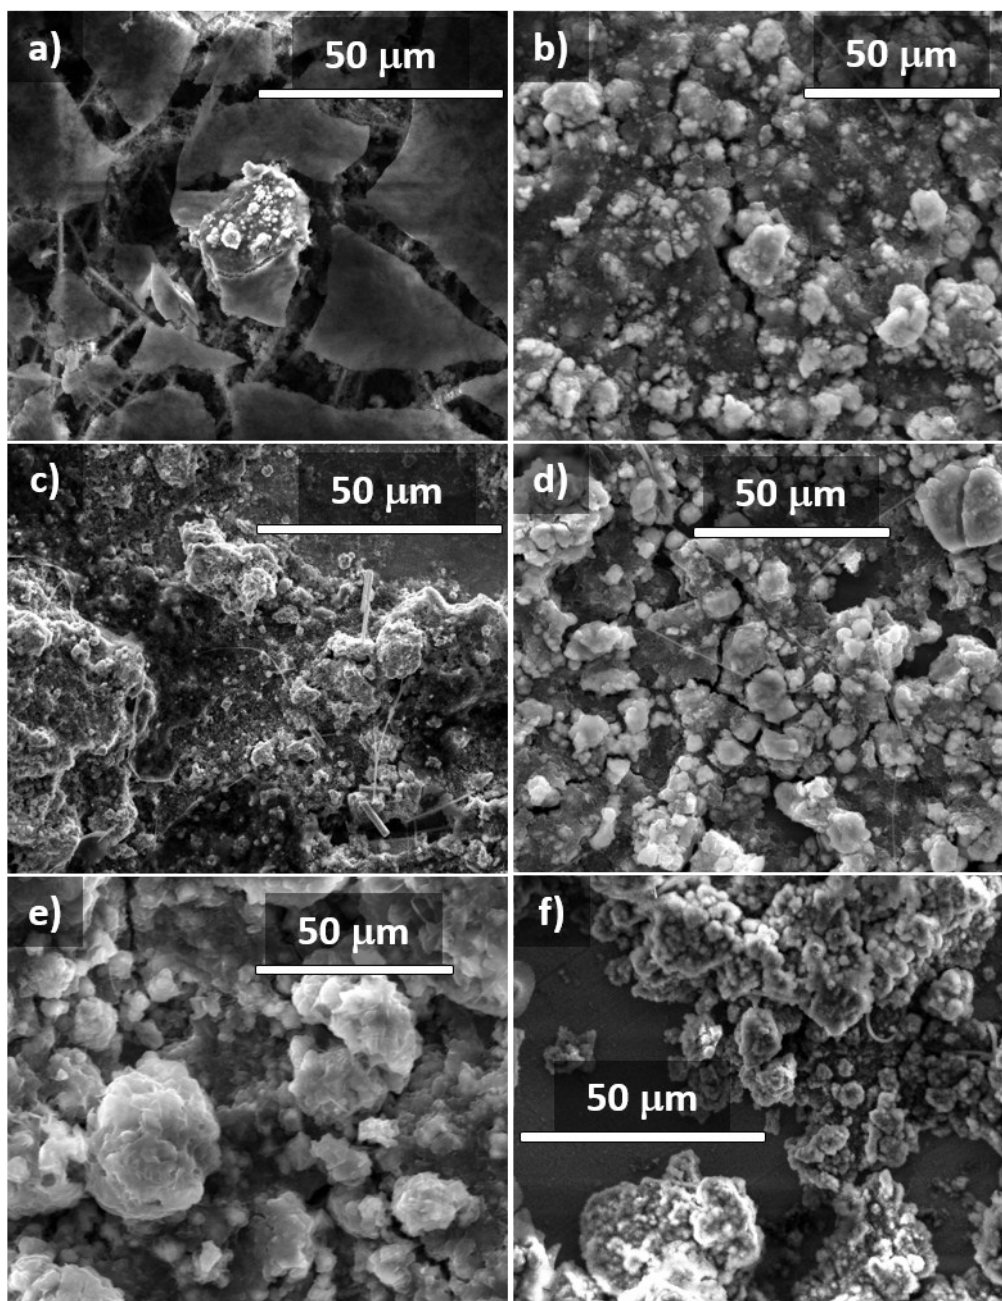

Figure S3. SEM images of Sn<sub>4</sub>P<sub>3</sub>/C electrodes after 100 charge/discharge cycles in a) NaClO<sub>4</sub>/EC:PC, b) NaClO<sub>4</sub>/EC:PC:FEC, c) NaPF<sub>6</sub>/EC:PC, d) NaPF<sub>6</sub>/EC:PC:FEC, e) NaPF<sub>6</sub>/DEGDME and f) NaPF<sub>6</sub>/DEGDME:FEC electrolytes.

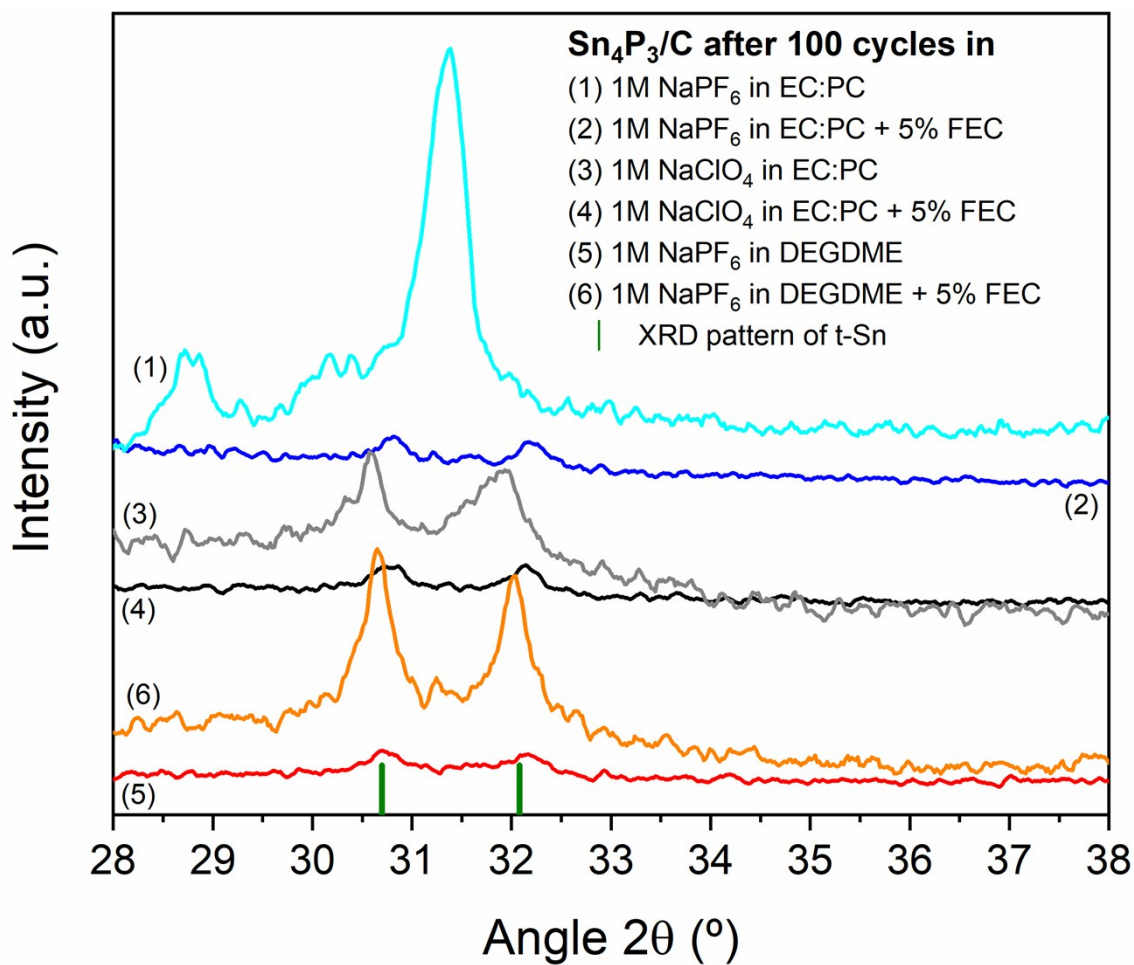

Figure S4. X-ray diffractograms of the Sn<sub>4</sub>P<sub>3</sub>/C electrodes after 100 charge/discharge cycles in the different electrolytes. The green bars indicate the position of the most intense peaks of the t-Sn reference.

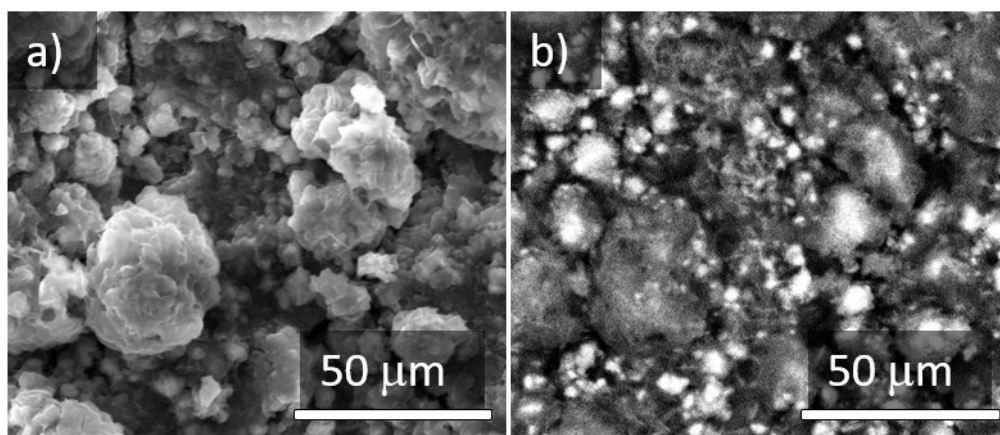

Figure S5. SEM (a) and BSE (b) images of  $\text{Sn}_4\text{P}_3/\text{C}$  electrode after 100 cycles in  $\text{NaPF}_6/\text{DEGDME}$  electrolyte. The heavier elements are shown as brighter spots in the BSE images.

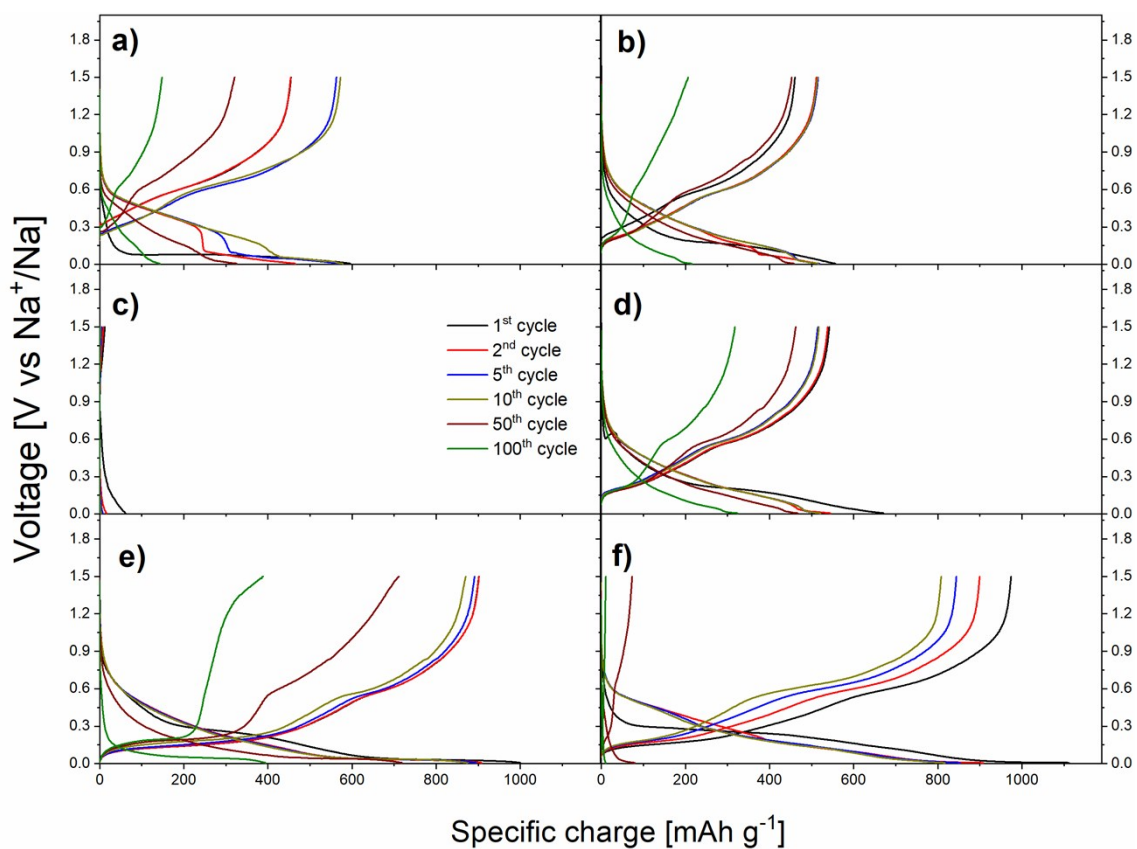

Figure S6. Galvanostatic curves of the 1<sup>st</sup>, 2<sup>nd</sup>, 5<sup>th</sup>, 10<sup>th</sup>, 50<sup>th</sup> and 100<sup>th</sup> charge/discharge cycles of  $\text{Sn}_4\text{P}_3/\text{C}$  electrodes cycled in a)  $\text{NaClO}_4/\text{EC}:\text{PC}$ , b)  $\text{NaClO}_4/\text{EC}:\text{PC}:\text{FEC}$ , c)  $\text{NaPF}_6/\text{EC}:\text{PC}$ , d)  $\text{NaPF}_6/\text{EC}:\text{PC}:\text{FEC}$ , e)  $\text{NaPF}_6/\text{DEGDME}$  and f)  $\text{NaPF}_6/\text{DEGDME}:\text{FEC}$  electrolyte.

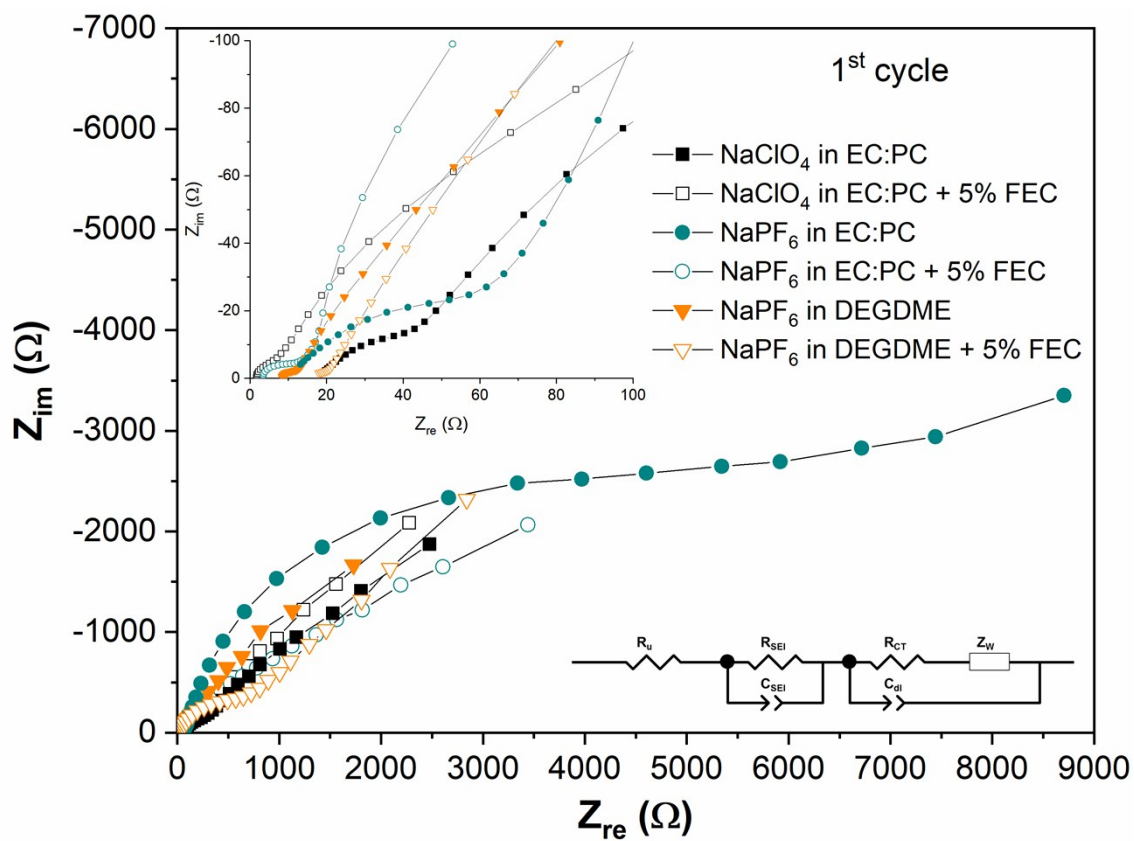

Figure S7. Electrochemical impedance spectroscopy of the Sn<sub>4</sub>P<sub>3</sub>/C electrodes cycled in the different electrolytes after the 1<sup>st</sup> cycle in the discharged (desodiated) state. The two insets show the equivalent circuit used for fitting the spectra and a zoom of the high frequency part.

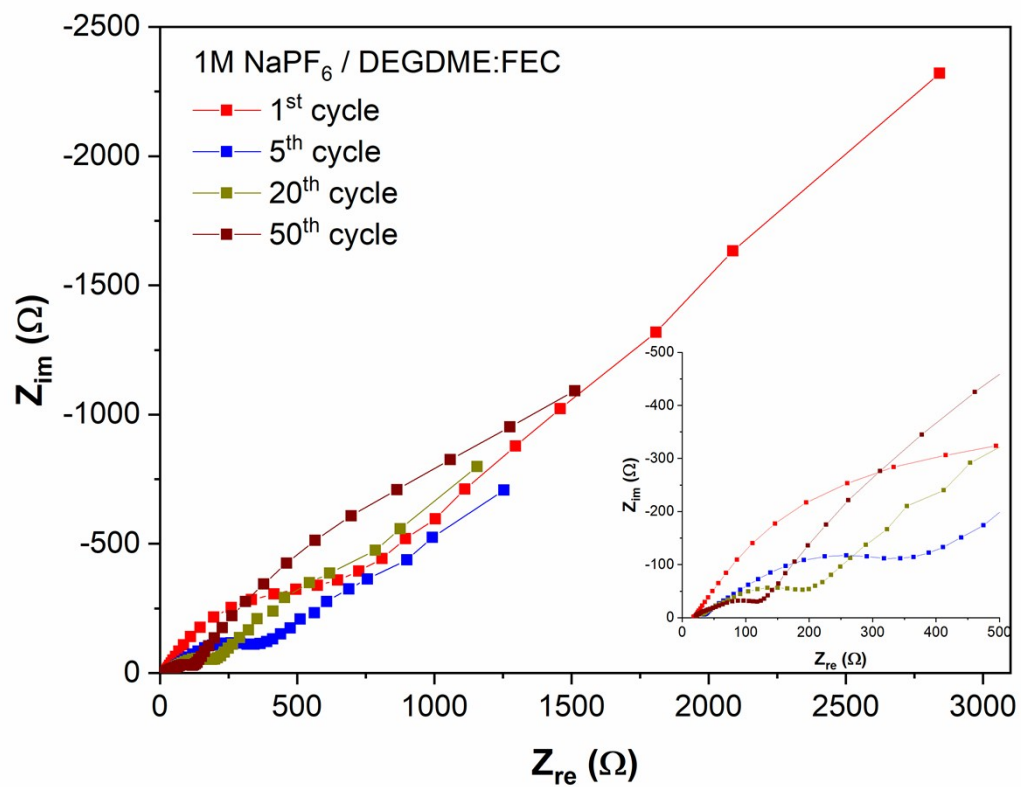

Figure S8. Electrochemical impedance spectroscopy of the  $\text{Sn}_4\text{P}_3/\text{C}$  electrodes cycled in  $\text{NaPF}_6/\text{DEGDME:FEC}$  electrolyte after the 1<sup>st</sup>, 5<sup>th</sup>, 20<sup>th</sup> and 50<sup>th</sup> in the discharged (desodiated) state. Inset shows a zoom of the high and middle frequency part.



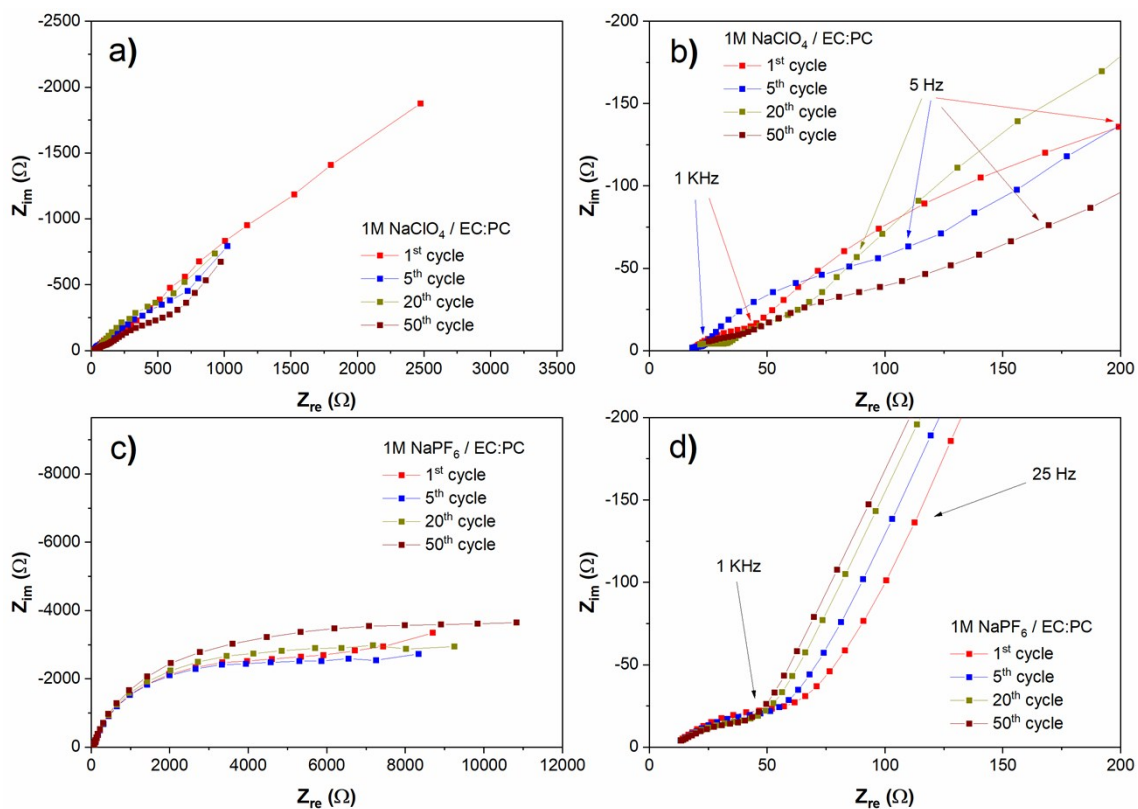

Figure S9. Electrochemical impedance spectroscopy of the Sn<sub>4</sub>P<sub>3</sub>/C electrodes cycled in NaClO<sub>4</sub>/EC:PC (a, b) and NaPF<sub>6</sub>/EC:PC (c, d) electrolytes after the 1<sup>st</sup>, 5<sup>th</sup>, 20<sup>th</sup> and 50<sup>th</sup> in the discharged (desodiated) state. Images b and d are zooms of the high and middle frequency part of figures a and c, respectively.

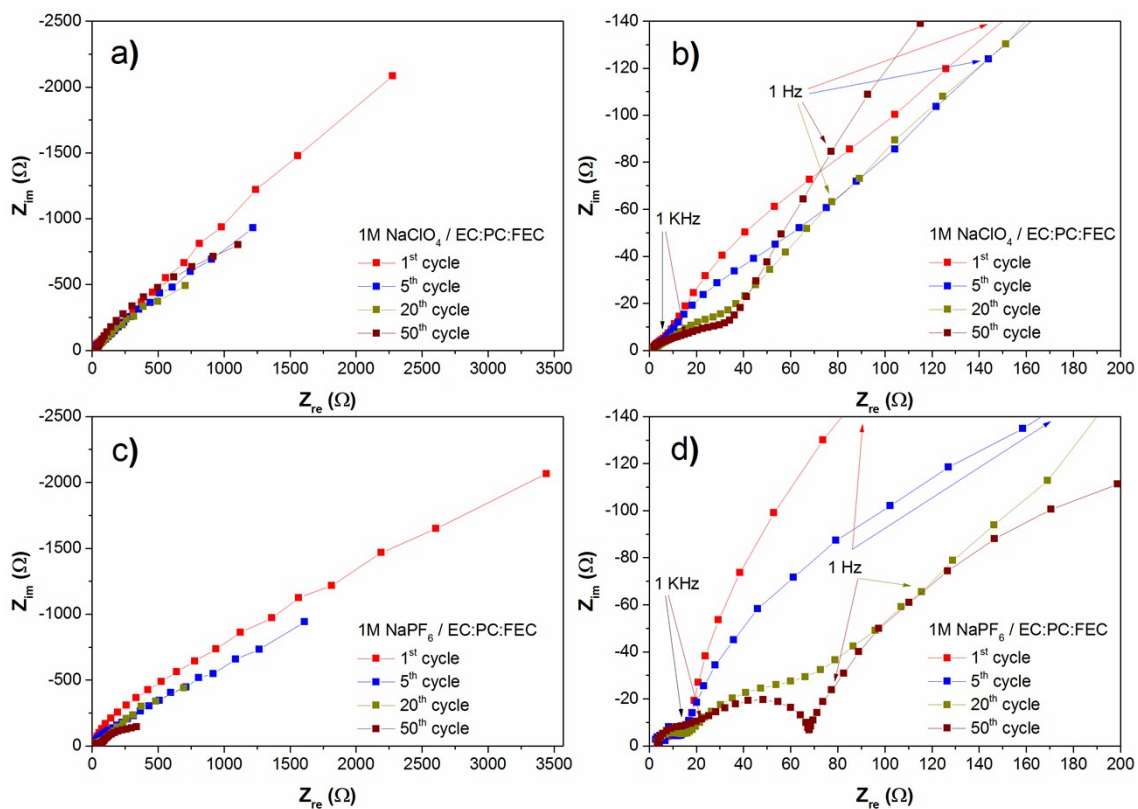

Figure S10. Electrochemical impedance spectroscopy of the  $\text{Sn}_4\text{P}_3/\text{C}$  electrodes cycled in  $\text{NaClO}_4/\text{EC}:\text{PC}:\text{FEC}$  (a, b) and  $\text{NaPF}_6/\text{EC}:\text{PC}:\text{FEC}$  (c, d) electrolytes after the 1<sup>st</sup>, 5<sup>th</sup>, 20<sup>th</sup> and 50<sup>th</sup> in the discharged (desodiated) state. Images b and d are zooms of the high and middle frequency part of figures a and c, respectively.

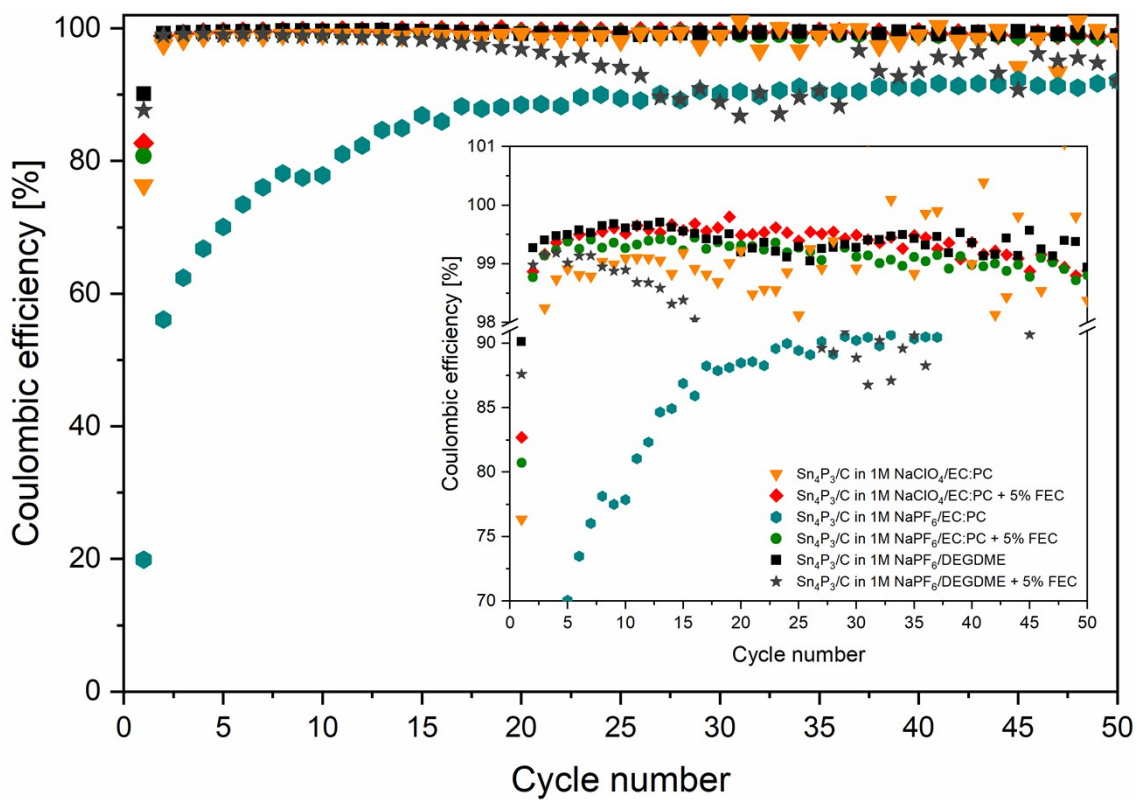

Figure S11. Coulombic efficiency of the  $\text{Sn}_4\text{P}_3@\text{C}$  electrodes cycled in  $\text{NaClO}_4/\text{EC}:\text{PC}:\text{FEC}$ ,  $\text{NaPF}_6/\text{EC}:\text{PC}:\text{FEC}$  and  $\text{NaPF}_6/\text{DEGDME}$  electrolytes.

Table S1. Comparison of the electrochemical performance of our Sn<sub>4</sub>P<sub>3</sub>@C electrodes and the data obtained from the literature.

| Synthesis method               | Material                                             | Electrode formulation (active material/cond. add/binder) [%] | Electrolyte                                                | Voltage window [V vs. Na <sup>+</sup> /Na] | Reversible specific charge (current density) [mAh g <sup>-1</sup> (mA g <sup>-1</sup> )]                                                                                                                                     | Initial coulombic efficiency [%]  | Capacity retention (% , n° cycles) <sup>d</sup>                                  | Ref. |
|--------------------------------|------------------------------------------------------|--------------------------------------------------------------|------------------------------------------------------------|--------------------------------------------|------------------------------------------------------------------------------------------------------------------------------------------------------------------------------------------------------------------------------|-----------------------------------|----------------------------------------------------------------------------------|------|
| High energy mechanical milling | Sn <sub>4</sub> P <sub>3</sub>                       | 70/10/20 (a.m./Super P/PAA)                                  | 1M NaClO <sub>4</sub> in EC:DEC (1:1) + 5% FEC             | 1.5 – 0                                    | 833 (100) without FEC <sup>a</sup><br>718 (100) with FEC <sup>a</sup>                                                                                                                                                        | ~84% without FEC<br>~79% with FEC | ~100%, 100 cy.                                                                   | [1]  |
| High energy mechanical milling | Sn <sub>4</sub> P <sub>3</sub> /C (70/30)            | 80/10/10 (a.m./Super P/CMC)                                  | 1M NaPF <sub>6</sub> in EC:DEC (1:1) + 5% FEC              | 2 – 0                                      | 816 (50) <sup>a</sup><br>650 (100) <sup>b</sup><br>560 (200) <sup>b</sup><br>435 (500) <sup>b</sup><br>349 (1000) <sup>b</sup>                                                                                               | 77.3%                             | 86%, 150 cy.                                                                     | [2]  |
| Low energy ball milling        | Sn <sub>4+x</sub> P <sub>3</sub> @amorphous Sn-P     | 70/10/20 (a.m./carbon black/CMC)                             | 1M NaClO <sub>4</sub> in EC:DEC (1:1) + 5% FEC             | 1.5 – 0                                    | 892 (100) <sup>a</sup><br>543 (100) <sup>b</sup><br>478.8 (200) <sup>b</sup><br>423.3 (500) <sup>b</sup><br>317.7 (1000) <sup>b</sup><br>245.2 (2000) <sup>b</sup><br>165.0 (5000) <sup>b</sup><br>58.2 (10000) <sup>b</sup> | 86.6%                             | 72.1%, 100 cy.                                                                   | [3]  |
| Hydrothermal method            | Yolk-shell Sn <sub>4</sub> P <sub>3</sub> @C (10% C) | 70/20/10 (a.m./carbon black/PVDF)                            | 1M NaClO <sub>4</sub> in PC + 5% FEC                       | 2 – 0.01                                   | 711 (100) <sup>a</sup><br>648 (200) <sup>b</sup><br>586 (400) <sup>b</sup><br>523 (800) <sup>b</sup><br>455 (1500) <sup>b</sup><br>379 (3000) <sup>b</sup>                                                                   | 43.8%                             | 65.2%, 50 cy. @100 mA g <sup>-1</sup> /<br>20%, 400 cy. @1500 mA g <sup>-1</sup> | [4]  |
| High energy mechanical milling | Sn <sub>4</sub> P <sub>3</sub>                       | 70/10/20 (a.m./Super P/PAA)                                  | 1M NaClO <sub>4</sub> in EC:PC (1:1) / + FEC / + FEC +TMSP | 1.5 – 0                                    | 1131 /<br>720 /<br>852 (C/20) <sup>c</sup>                                                                                                                                                                                   | ~71% / 79.6% /<br>81.2%           | 30.3% / 76.9% / 92.3%,<br>50 cy. @C/10 <sup>c</sup>                              | [5]  |
| Solvothermal method            | Sn <sub>4</sub> P <sub>3</sub>                       | 70/20/10 (a.m./carbon black/PVDF)                            | 1M NaClO <sub>4</sub> in EC:DEC (1:1) + 5% FEC             | 3 – 0.01                                   | 647 (50)                                                                                                                                                                                                                     | 52.8%                             | 24.9%, 10 cy.                                                                    | [6]  |

|                                             |                                                      |                                          |                                                                                   |             |                                                                                      |                                                                                                       |                                                                                                                               |      |
|---------------------------------------------|------------------------------------------------------|------------------------------------------|-----------------------------------------------------------------------------------|-------------|--------------------------------------------------------------------------------------|-------------------------------------------------------------------------------------------------------|-------------------------------------------------------------------------------------------------------------------------------|------|
| Solvothermal method                         | Sn <sub>4</sub> P <sub>3</sub> /rGO, 10.4% C         | 80/10/10 (a.m./carbon black/PVDF)        | 1M NaClO <sub>4</sub> in PC + 5% FEC                                              | 3 – 0.01    | 775 (100)                                                                            | 46.6%                                                                                                 | 84.6%, 100 cy.                                                                                                                | [7]  |
| Solvothermal method                         | Sn <sub>4</sub> P <sub>3</sub>                       | 60/20/20 (a.m./Super P/CMC-PAA)          | 1M NaClO <sub>4</sub> in EC:PC (1:1) + 5% FEC                                     | 1.5 – 0.001 | 510 (100)<br>464 (5000)                                                              | 59%                                                                                                   | 83%, 100 cy.                                                                                                                  | [8]  |
| High energy mechanical milling              | Sn <sub>4</sub> P <sub>3</sub> / 0–30% TiC           | 80/10/10 (a.m./acetylene black/CMC)      | 1M NaClO <sub>4</sub> in PC + 5% FEC                                              | 1.5 – 0.01  | 532.3, 0%TiC (100)<br>~495, 10%TiC (100)<br>~420, 20%TiC (100)<br>~315, 30%TiC (100) | 85.5% (0%TiC)<br>84.3% (10%TiC)<br>84.1% (20%TiC)<br>80.8% (30%TiC)                                   | 17.4%, 100 cy. (0% TiC)<br>41.1%, 100 cy. (10% TiC)<br>82.9%, 100 cy. (20% TiC)<br>94.5%, 100 cy. (30% TiC)                   | [9]  |
| Purchased (Alfa-Aesar)                      | Commercial Sn <sub>4</sub> P <sub>3</sub> /MWCNT 20% | 80/10/10 (a.m./carbon black/Na-alginate) | 1M NaClO <sub>4</sub> in FEC/DMC (1:1)                                            | 1.5 – 0.01  | 520 – 501 (100)<br>500 (200)<br>464 (300)<br>397 (500)<br>259 (1000)                 | 73.9%                                                                                                 | 90.2%, 120 cy.                                                                                                                | [10] |
| Aerosol spray pyrolysis + thermal treatment | Sn <sub>4</sub> P <sub>3</sub> @C, 24% C             | 70/15/15 (a.m./carbon black/Na-alginate) | 1M NaPF <sub>6</sub> in:<br>1) DME<br>2) EC:DMC (1:1)<br>3) EC:DMC (1:1) + 5% FEC | 1.5 – 0     | 1) ~770 (100)<br>2) ~600 (100)<br>3) ~700 (100)                                      | 1) 90.7% @50 mA g <sup>-1</sup><br>2) 72.7% @50 mA g <sup>-1</sup><br>3) 59.8% @50 mA g <sup>-1</sup> | 1) 82%, 120 cy. @100 mA g <sup>-1</sup><br>2) 54%, 110 cy. @100 mA g <sup>-1</sup><br>3) 95%, 120 cy. @100 mA g <sup>-1</sup> | [11] |
| Ball milling                                | Sn <sub>4</sub> P <sub>3</sub> /C, 12.5% C           | 80/10/10 (a.m./Super P/CMC)              | 1M NaClO <sub>4</sub> in PC + 5% FEC                                              | 2 – 0.01    | ~600 (100)<br>~510 (200)<br>~450 (500)<br>~385 (1000)<br>~255 (2000)                 | ~82% @100 mA g <sup>-1</sup>                                                                          | ~77%, 200 cy. @500 mA g <sup>-1</sup><br>~65%, 200 cy. @1000 mA g <sup>-1</sup>                                               | [12] |
| Solution chemistry method                   | Sn <sub>4</sub> P <sub>3</sub>                       | 70/20/10 (a.m./MWCNT/CMC)                | 1M NaClO <sub>4</sub> in PC + 5% FEC                                              | 2 – 0       | 749 (50)<br>659 (100)<br>591 (200)<br>501 (500)<br>399 (1000)                        | 72.7%                                                                                                 | 92%, 80 cy. @200 mA g <sup>-1</sup><br>82%, 50 cy. @500 mA g <sup>-1</sup>                                                    | [13] |
| Hydrothermal method                         | Sn <sub>4</sub> P <sub>3</sub> -C, 19.4% C           | 70/20/10 (a.m./Super P/PAA)              | 1M NaClO <sub>4</sub> in EC:DMC + 5% FEC                                          | 2 – 0       | 721 (200)<br>680 (500)<br>495 (1000)<br>390 (2000)<br>260 (4000)                     | 60%                                                                                                   | 90.1%, 50cy.                                                                                                                  | [14] |

|                                               |                                                       |                                      |                                               |             |                                                                                             |       |                |          |
|-----------------------------------------------|-------------------------------------------------------|--------------------------------------|-----------------------------------------------|-------------|---------------------------------------------------------------------------------------------|-------|----------------|----------|
| Solution chemistry + annealing + solvothermal | Sn <sub>4</sub> P <sub>3</sub> @C yolk-shell, n.d. %C | 70/20/10 (a.m./acetylene black/PVDF) | 1M NaClO <sub>4</sub> in PC + 5% FEC          | 2 – 0.01    | 771 (100)<br>725 (200)<br>642 (500)<br>583 (1000)<br>508 (2000)                             | 63.7% | 90.9%, 50 cy.  | [15]     |
| Ball milling                                  | Sn <sub>4</sub> P <sub>3</sub> @C, 6% C               | 80/10/10 (a.m./Super C65/CMC)        | 1M NaClO <sub>4</sub> in EC:PC (1:1) + 5% FEC | 1.5 – 0.005 | 507 (100)<br>432 (200)<br>340 (500)<br>270 (1000)<br>180 (2000)<br>80 (5000)<br>10 (10000)  | 82.7% | 44.9%, 100 cy. | Our work |
| Ball milling                                  | Sn <sub>4</sub> P <sub>3</sub> @C, 6% C               | 80/10/10 (a.m./Super C65/CMC)        | 1M NaPF <sub>6</sub> in EC:PC (1:1) + 5% FEC  | 1.5 – 0.005 | 505 (100)<br>432 (200)<br>345 (500)<br>270 (1000)<br>175 (2000)<br>85 (5000)<br>15 (10000)  | 80.7% | 58.6%, 100 cy. | Our work |
| Ball milling                                  | Sn <sub>4</sub> P <sub>3</sub> @C, 6% C               | 80/10/10 (a.m./Super C65/CMC)        | 1M NaPF <sub>6</sub> in DEGDME                | 1.5 – 0.005 | 820 (100)<br>740 (200)<br>660 (500)<br>570 (1000)<br>200 (2000)<br>170 (5000)<br>75 (10000) | 90.1% | 43.1%, 100 cy. | Our work |

<sup>a</sup> 1<sup>st</sup> cycle reversible specific charge

<sup>b</sup> average specific charge at the given current density

<sup>c</sup> current density used to calculate C-rate was not specified

<sup>d</sup> Capacity retention at the lower current density, unless otherwise stated

## References (Supporting information)

- [1] Y. Kim, Y. Kim, A. Choi, S. Woo, D. Mok, N.-S. Choi, Y.S. Jung, J.H. Ryu, S.M. Oh, K.T. Lee, Tin Phosphide as a Promising Anode Material for Na-Ion Batteries, *Adv. Mater.* 26 (2014) 4139–4144. doi:10.1002/adma.201305638.
- [2] J. Qian, Y. Xiong, Y. Cao, X. Ai, H. Yang, Synergistic Na-Storage Reactions in  $\text{Sn}_4\text{P}_3$  as a High-Capacity, Cycle-stable Anode of Na-Ion Batteries, *Nano Lett.* 14 (2014) 1865–1869. doi:10.1021/nl404637q.
- [3] W. Li, S.-L. Chou, J.-Z. Wang, J.H. Kim, H.-K. Liu, S.-X. Dou,  $\text{Sn}_{4+x}\text{P}_3$ @ Amorphous Sn-P Composites as Anodes for Sodium-Ion Batteries with Low Cost, High Capacity, Long Life, and Superior Rate Capability, *Adv. Mater.* 26 (2014) 4037–4042. doi:10.1002/adma.201400794.
- [4] J. Liu, P. Kopold, C. Wu, P.A. van Aken, J. Maier, Y. Yu, Uniform yolk-shell  $\text{Sn}_4\text{P}_3$ @C nanospheres as high-capacity and cycle-stable anode materials for sodium-ion batteries, *Energy Env. Sci.* 8 (2015) 3531–3538. doi:10.1039/C5EE02074C.
- [5] J.Y. Jang, Y. Lee, Y. Kim, J. Lee, S.-M. Lee, K.T. Lee, N.-S. Choi, Interfacial architectures based on a binary additive combination for high-performance  $\text{Sn}_4\text{P}_3$  anodes in sodium-ion batteries, *J Mater Chem A.* 3 (2015) 8332–8338. doi:10.1039/C5TA00724K.
- [6] S. Liu, H. Zhang, L. Xu, L. Ma, X. Chen, Solvothermal preparation of tin phosphide as a long-life anode for advanced lithium and sodium ion batteries, *J. Power Sources.* 304 (2016) 346–353. doi:10.1016/j.jpowsour.2015.11.056.
- [7] Q. Li, Z. Li, Z. Zhang, C. Li, J. Ma, C. Wang, X. Ge, S. Dong, L. Yin, Low-Temperature Solution-Based Phosphorization Reaction Route to  $\text{Sn}_4\text{P}_3$ /Reduced Graphene Oxide Nanohybrids as Anodes for Sodium Ion Batteries, *Adv. Energy Mater.* 6 (2016) 1600376. doi:10.1002/aenm.201600376.
- [8] H.-S. Shin, K.-N. Jung, Y.N. Jo, M.-S. Park, H. Kim, J.-W. Lee, Tin phosphide-based anodes for sodium-ion batteries: synthesis via solvothermal transformation of Sn metal and phase-dependent Na storage performance, *Sci. Rep.* 6 (2016). doi:10.1038/srep26195.
- [9] W. Wang, J. Zhang, D.Y.W. Yu, Q. Li, Improving the cycling stability of  $\text{Sn}_4\text{P}_3$  anode for sodium-ion battery, *J. Power Sources.* 364 (2017) 420–425. doi:10.1016/j.jpowsour.2017.08.060.
- [10] J. Mao, X. Fan, C. Luo, C. Wang, Building Self-Healing Alloy Architecture for Stable Sodium-Ion Battery Anodes: A Case Study of Tin Anode Materials, *ACS Appl. Mater. Interfaces.* 8 (2016) 7147–7155. doi:10.1021/acsami.6b00641.
- [11] X. Fan, T. Gao, C. Luo, F. Wang, J. Hu, C. Wang, Superior reversible tin phosphide-carbon spheres for sodium ion battery anode, *Nano Energy.* 38 (2017) 350–357. doi:10.1016/j.nanoen.2017.06.014.
- [12] W. Zhang, J. Mao, W.K. Pang, Z. Guo, Z. Chen, Large-scale synthesis of ternary  $\text{Sn}_5\text{SbP}_3$ /C composite by ball milling for superior stable sodium-ion battery anode, *Electrochimica Acta.* 235 (2017) 107–113. doi:10.1016/j.electacta.2017.03.093.
- [13] D. Lan, W. Wang, L. Shi, Y. Huang, L. Hu, Q. Li, Phase pure  $\text{Sn}_4\text{P}_3$  nanotops by solution-liquid-solid growth for anode application in sodium ion batteries, *J. Mater. Chem. A.* 5 (2017) 5791–5796. doi:10.1039/C6TA10685D.
- [14] J. Choi, W.-S. Kim, K.-H. Kim, S.-H. Hong,  $\text{Sn}_4\text{P}_3$ -C nanospheres as high capacitive and ultra-stable anodes for sodium ion and lithium ion batteries, *J. Mater. Chem. A.* (2018). doi:10.1039/C8TA05586F.
- [15] L. Ma, P. Yan, S. Wu, G. Zhu, Y. Shen, Engineering tin phosphides@carbon yolk-shell nanocube structures as a highly stable anode material for sodium-ion batteries, *J. Mater. Chem. A.* 5 (2017) 16994–17000. doi:10.1039/C7TA04900E.
